# Supplementary material for: Persistence of Burkholderia thailandensis E264 in lung tissue after a single binge alcohol episode
Source: PubMed Central journal article supplement (PMC6903738; doi:10.1371/journal.pone.0218147), 2019-12-10
Supplement: pone.0218147.s001.pdf [file pone.0218147.s001.pdf]

**S1 Table. Average body weight of binge drinking C57BL/6 mice intranasally infected with different bacterial doses.** Mice were administered alcohol (4.4 g/kg) and 30 min later intranasally infected with various bacterial doses. Mice were weighed before infection and 24 h post infection. PBS (control) indicates mice that were not infected or administered alcohol. Alcohol (control) indicates mice that were administered alcohol and not infected. (\*) indicates statistical comparison between pre-infection and post-infection (24 h) per group by Student's unpaired *t*-test, \*,  $p \leq 0.05$ , \*\*,  $p \leq 0.01$ .

| Body Weight (g)                |                          |                          |              |
|--------------------------------|--------------------------|--------------------------|--------------|
| <i>B. thailandensis</i> (CFUs) | Pre-Infection            | Post-Infection (24 h)    | Decrease (%) |
| PBS (control)                  | $19.8 \pm 0.012$ (n = 6) | $19.8 \pm 0.015$ (n = 6) | 0.0          |
| Alcohol (control)              | $19.7 \pm 0.121$ (n = 6) | $19.8 \pm 0.132$ (n = 6) | 0.0          |
| 3 x 10 <sup>5</sup>            | $19.3 \pm 0.327$ (n = 6) | $17.6 \pm 0.230$ (n = 6) | 8.8 **       |
| 5 x 10 <sup>4</sup>            | $19.6 \pm 0.528$ (n = 6) | $17.9 \pm 0.478$ (n = 6) | 8.7 *        |
| 8 x 10 <sup>3</sup>            | $19.7 \pm 0.448$ (n = 6) | $17.6 \pm 0.412$ (n = 6) | 10.7 **      |
| 500                            | $19.5 \pm 0.351$ (n = 6) | $17.1 \pm 0.444$ (n = 6) | 12.3 **      |

Values are means  $\pm$  SEM; n, number of mice
