# Supplementary material for: Persistence of Burkholderia thailandensis E264 in lung tissue after a single binge alcohol episode
Source: PubMed Central journal article supplement (PMC6903738; doi:10.1371/journal.pone.0218147), 2019-12-10
Supplement: pone.0218147.s002.pdf [file pone.0218147.s002.pdf]

**S2 Table. Average body weight of C57BL/6 mice administered different binge-alcohol doses.** Mice were administered alcohol at doses (4.4, 3, 2, 1 g/kg) and 30 min later intranasally infected with *B. thailandensis* ( $3 \times 10^5$ ). Mice were weighed before infection and 24 h post infection. PBS (control) indicates mice that were not infected or administered alcohol. Alcohol (control) indicates mice that were administered alcohol and not infected. (\*) indicates statistical comparison between pre-infection and post-infection (24 h) per group by Student's unpaired *t*-test, \*,  $p \leq 0.05$ , \*\*,  $p \leq 0.01$ .

| Body Weight (g)   |                      |                       |              |
|-------------------|----------------------|-----------------------|--------------|
| BAC (%)           | Pre-Infection        | Post-Infection (24 h) | Decrease (%) |
| PBS (control)     | 19.3 ± 0.023 (n = 6) | 19.3 ± 0.058 (n = 6)  | 0.0          |
| Alcohol (control) | 19.4 ± 0.098 (n = 6) | 19.5 ± 0.131 (n = 6)  | 0.0          |
| 0.254             | 19.5 ± 0.312 (n = 6) | 17.7 ± 0.241 (n = 6)  | 9.2 ***      |
| 0.152             | 19.3 ± 0.582 (n = 6) | 17.7 ± 0.393 (n = 6)  | 8.2 *        |
| 0.0265            | 18.8 ± 0.412 (n = 6) | 17.4 ± 0.300 (n = 6)  | 7.4 *        |
| 0.00397           | 19.1 ± 0.203 (n = 6) | 18.1 ± 0.267 (n = 6)  | 5.2 *        |

Values are means ± SEM; n, number of mice
