# Supplementary material for: Persistence of Burkholderia thailandensis E264 in lung tissue after a single binge alcohol episode
Source: PubMed Central journal article supplement (PMC6903738; doi:10.1371/journal.pone.0218147), 2019-12-10
Supplement: pone.0218147.s003.pdf [file pone.0218147.s003.pdf]

**S3 Table. Average body weight of C57BL/6 mice administered binge-alcohol doses at different times prior to infection.** Mice were administered alcohol (4.4 g/kg) and (0.5, 3, 6, or 24 h) later mice were intranasally infected with *B. thailandensis* ( $5 \times 10^5$ ). Mice were weighed before infection and 24 h post infection. PBS (control) indicates mice that were not infected or administered alcohol. Alcohol (control) indicates mice that were administered alcohol and not infected. (\*) indicates statistical comparison between pre-infection and post-infection (24 h) per group by Student's unpaired *t*-test, \*,  $p \leq 0.05$ , \*\*,  $p \leq 0.01$ , \*\*\*,  $p \leq 0.001$ .

| Alcohol Before Infect.(h) | Body Weight (g)      |                       | Decrease (%) |
|---------------------------|----------------------|-----------------------|--------------|
|                           | Pre-Infection        | Post-Infection (24 h) |              |
| PBS (control)             | 20.1 ± 0.211 (n = 6) | 20.4 ± 0.112 (n = 6)  | 0.0          |
| Alcohol (control)         | 19.7 ± 0.158 (n = 6) | 19.8 ± 0.212 (n = 6)  | 0.0          |
| 0.5                       | 20.4 ± 0.584 (n = 6) | 18.5 ± 0.549 (n = 6)  | 9.3 *        |
| 3                         | 19.3 ± 0.407 (n = 6) | 17.5 ± 0.538 (n = 6)  | 9.3 *        |
| 6                         | 19.3 ± 0.231 (n = 6) | 17.2 ± 0.338 (n = 6)  | 10.8 ***     |
| 24                        | 19.6 ± 0.373 (n = 6) | 17.7 ± 0.359 (n = 6)  | 9.7 **       |

Values are means ± SEM; n, number of mice
