# Supplementary material for: Persistence of Burkholderia thailandensis E264 in lung tissue after a single binge alcohol episode
Source: PubMed Central journal article supplement (PMC6903738; doi:10.1371/journal.pone.0218147), 2019-12-10
Supplement: pone.0218147.s004.pdf [file pone.0218147.s004.pdf]

**S4 Table. Average *B. thailandensis* detected in C57BL/6 whole blood.** Whole blood cultures were collected 24 h post infection via cardiac puncture and viable *B. thailandensis* E264 was grown on LB media plates to determine colony forming units (CFUs). *B. thailandensis* E264 colonies confirmed per plate and assay. Whole blood CFUs represent average number of colonies for each group within a specific experimental assay; 1. Bacterial dosage (inoculum CFUs), 2. Alcohol dosage (administered alcohol), or 3. Temporal effects (alcohol before infection).

| Bacteria Detected in Whole Blood (CFUs)                  |                                       |
|----------------------------------------------------------|---------------------------------------|
| <b>1. Bacterial Dosage: Inoculum (CFUs)</b>              |                                       |
| 3 x 10 <sup>5</sup>                                      | 3.2 x 10 <sup>3</sup> ± 0.112 (n = 6) |
| 5 x 10 <sup>4</sup>                                      | 5.2 x 10 <sup>2</sup> ± 0.211 (n = 6) |
| 8 x 10 <sup>3</sup>                                      | 0.0 (n = 6)                           |
| 500                                                      | 0.0 (n = 6)                           |
| 0                                                        | 0.0 (n = 6)                           |
| (PBS & BAC 0.254 %)                                      |                                       |
| <b>2. Alcohol Dosage: Administered Alcohol (g/kg)</b>    |                                       |
| 4.4                                                      | 3.5 x 10 <sup>3</sup> ± 0.154 (n = 6) |
| 3                                                        | 2.2 x 10 <sup>3</sup> ± 0.132 (n = 6) |
| 2                                                        | 0.0 (n = 6)                           |
| 1                                                        | 0.0 (n = 6)                           |
| 0                                                        | 0.0 (n = 6)                           |
| (3 x 10 <sup>5</sup> CFUs & PBS)                         |                                       |
| <b>3. Temporal Effects: Alcohol Before Infection (h)</b> |                                       |
| 0.5                                                      | 3.3 x 10 <sup>3</sup> ± 0.124 (n = 6) |
| 3                                                        | 1.9 x 10 <sup>3</sup> ± 0.128 (n = 6) |
| 6                                                        | 0.0 (n = 6)                           |
| 24                                                       | 0.0 (n = 6)                           |
| Control                                                  | 0.0 (n = 6)                           |
| (5 x 10 <sup>5</sup> CFUs & PBS 0.5 h before infection)  |                                       |

Values are means ± SEM; n, number of mice
